# Supplementary material for: Antitumor Mechanisms of Curcumae Rhizoma Based on Network Pharmacology
Source: Evid Based Complement Alternat Med. 2018 Feb 5;2018:4509892. doi: 10.1155/2018/4509892 (PMC5832109; doi:10.1155/2018/4509892)
Supplement: Supplementary 1 — Table S1: 81 compounds of Curcumae Rhizoma. [file 4509892.f1.xls]

## Sheet: Sheet1
Mol ID	Molecule name	MW	AlogP	Hdon	Hacc	OB(%)	Caco-2	BBB	DL	FASA-	HL
MOL000018	(+/-)-Isoborneol	154.28	1.98	1	1	86.98	1.27	1.6	0.05	0	11.36
MOL000019	D-Camphene	136.26	2.93	0	0	34.98	1.81	2.19	0.04	0	11.29
MOL000023	Hemo-sol	136.26	3.5	0	0	39.84	1.83	2.12	0.02	0	11.68
MOL000024	alpha-humulene	204.39	5.04	0	0	22.98	1.88	2.08	0.06	0
MOL000027	alpha-Curcumene	202.37	5.34	0	0	4.68	1.93	1.99	0.06	0
MOL000032	beta-Eudesmol	222.41	3.72	1	1	26.09	1.32	1.38	0.1	0
MOL000035	beta-Selinene	204.39	4.81	0	0	24.39	1.83	2.12	0.08	0
MOL000036	beta-caryophyllene	204.39	4.75	0	0	29.7	1.83	2.07	0.09	0
MOL000037	γ-elemene	204.39	4.93	0	0	23.79	1.87	2.1	0.06	0
MOL000048	(5E,9Z)-3,6,10-trimethyl-4,7,8,11-tetrahydrocyclodeca[b]furan	216.35	4.63	0	1	43.17	1.77	1.83	0.1	0	-1.4
MOL000117	Cymol	134.24	3.51	0	0	27.2	1.86	2.1	0.02	0.34
MOL000118	(L)-alpha-Terpineol	154.28	2.42	1	1	48.8	1.39	1.72	0.03	0.27	11.35
MOL000130	CAM	152.26	1.94	0	1	67.17	1.29	1.71	0.05	0.27	11.34
MOL000197	Myrcene	136.26	3.69	0	0	24.96	1.84	1.98	0.02	0.37
MOL000208	()-Aromadendrene	204.39	4.22	0	0	55.74	1.81	2.06	0.1	0.26	11.84
MOL000244	()-Borneol	154.28	1.98	1	1	81.8	1.22	1.47	0.05	0.24	11.36
MOL000268	(1S,5S)-1-isopropyl-4-methylenebicyclo[3.1.0]hexane	136.26	2.93	0	0	46.21	1.83	2.18	0.04	0.31	11.47
MOL000295	alexandrin	576.95	6.34	4	6	20.63	-0.2	-0.81	0.63	0
MOL000296	hederagenin	414.79	8.08	1	1	36.91	1.32	0.96	0.75	0	5.35
MOL000474	(-)-Epoxycaryophyllene	220.39	3.52	0	1	35.94	1.57	1.83	0.13	0	6.09
MOL000485	TMH	136.26	2.87	0	0	46.25	1.82	2.18	0.05	0	11.42
MOL000615	delta-amorphene	204.39	4.94	0	0	17.95	1.85	1.99	0.08	0.24
MOL000669	(S)-camphor	152.26	1.94	0	1	21.68	1.28	1.74	0.05	0.28
MOL000887	demethoxycurrcumin	338.38	3.37	3	5	4.89	0.72	-0.04	0.33	0.35
MOL000888	demethoxycurrcumin	338.38	3.24	2	5	4.37	0.3	-0.25	0.33	0.37
MOL000889	isocurcumenol	234.37	2.93	1	2	97.67	1.11	1.24	0.13	0.25	9.52
MOL000890	(+)-alpha-Curcumene	202.37	5.34	0	0	26.56	1.93	2.03	0.06	0.33
MOL000891	(1R,10R)-epoxy-1,10-dihydrocurdione	252.39	1.97	0	3	36.73	0.68	0.64	0.12	0.28	3.23
MOL000892	TNP00001	368.41	3.22	2	6	4.37	0.35	-0.49	0.41	0.3
MOL000893	difurocumenone	444.66	6.74	0	3	8.86	1.21	0.85	0.61	0.23
MOL000894	turmerone	222.41	4.63	0	1	32.98	1.33	1.44	0.06	0.29	4.87
MOL000895	Zingiberene	204.39	5.08	0	0	18.8	1.91	2.01	0.06	0.3
MOL000896	13657-68-6	236.39	3.07	0	2	7	0.81	0.68	0.08	0.31
MOL000897	(3S,3aR,8aR)-3,8a-dihydroxy-5-isopropylidene-3,8-dimethyl-1,2,3a,4-tetrahydroazulen-6-one	250.37	1.93	2	3	38.7	0.1	-0.32	0.12	0.35	8.6
MOL000898	(1S,6R,7R)-4-isopropylidene-1-methyl-7-(3-oxobutyl)norcaran-3-one	234.37	2.23	0	2	34.17	0.91	0.61	0.11	0.29	5.82
MOL000899	Furanodiene	216.35	4.63	0	1	45.11	1.77	1.95	0.1	0.25	-1.17
MOL000900	(5R,6R)-5-isopropenyl-3,6-dimethyl-6-vinyl-5,7-dihydrobenzofuran-4-one	230.33	3.31	0	2	57.05	1.28	1.32	0.11	0.3	13.62
MOL000901	BRN 3094585	234.37	3.27	1	2	87.82	1.14	1.29	0.13	0.25	9.11
MOL000902	curcumol	236.39	2.79	1	2	103.55	1.12	1.23	0.13	0.25	9.38
MOL000903	Gweicurculactone	228.31	3.26	0	2	42.92	1.37	1.25	0.14	0.35	1.87
MOL000904	cineole	154.28	2.16	0	1	59.96	1.55	1.94	0.05	0.21	11.28
MOL000905	()-beta-Pinene	136.26	2.93	0	0	44.77	1.85	2.29	0.05	0.28	11.32
MOL000906	wenjine	282.37	2.06	1	5	47.93	0.3	0.3	0.27	0.34	5.1
MOL000907	curcumalactone	236.39	3.86	0	2	18.47	1.25	1.4	0.1	0.31
MOL000908	beta-elemene	204.39	4.79	0	0	25.63	1.84	2.07	0.06	0.33
MOL000909	(3S,4R)-3-isopropenyl-1-isopropyl-4-methyl-4-vinylcyclohexene	204.39	4.73	0	0	27.57	1.84	2.06	0.06	0.28
MOL000910	Germacron	218.37	4.33	0	1	32.5	1.33	1.53	0.07	0.33	7.22
MOL000911	Terpilene	136.26	3.45	0	0	33.95	1.84	2.1	0.02	0.27	11.05
MOL000912	(2S)-heptan-2-ol	116.23	2.26	1	1	23.49	1.14	1.3	0.01	0.21
MOL000913	tricyclene	136.26	2.3	0	0	36.11	1.8	2.22	0.07	0.25	11.36
MOL000914	(5S)-1-isopropyl-4-methylbicyclo[3.1.0]hex-3-ene	136.26	2.87	0	0	47.13	1.81	2.14	0.04	0.29	11.44
MOL000915	(1S,10S),(4S,5S)-germacrone-1(10),4-diepoxide	264.35	1.16	0	4	30.48	0.61	0.69	0.18	0.27	4.03
MOL000916	Car-3-ene	136.26	2.87	0	0	45.15	1.85	2.18	0.04	0.26	11.44
MOL000917	cineole	154.28	2.16	0	1	59.96	1.55	1.97	0.05	0.21	11.28
MOL000918	2-NONANONE	142.27	2.7	0	1	8.51	1.34	1.62	0.02	0.24
MOL000919	(S)-()-2-Nonanol	144.29	3.17	1	1	26	1.24	1.33	0.01	0.2
MOL000920	LINALOOL (D)	154.28	2.74	1	1	38.29	1.29	1.33	0.02	0.32	6.29
MOL000921	(1S,4E,10S)-8-isopropylidene-1,5-dimethyl-11-oxabicyclo[8.1.0]undec-4-en-7-one	234.37	3.09	0	2	27.26	0.94	0.88	0.11	0.33
MOL000922	(R)-p-Menth-1-en-4-ol	154.28	2.55	1	1	32.16	1.33	1.52	0.03	0.26	11.39
MOL000923	ACETIC ACID,BORNYL ESTER	196.32	2.35	0	2	67.15	1.26	1.52	0.08	0.22	7.05
MOL000924	Mnk	170.33	3.62	0	1	17.66	1.4	1.64	0.03	0.22
MOL000925	δ-elemene	204.39	4.73	0	0	21.47	1.86	2.14	0.06	0.3
MOL000926	cis-beta-farnesene	204.39	5.52	0	0	6.75	1.92	2.15	0.05	0.34
MOL000927	α-muurolene	204.39	4.75	0	0	17.24	1.88	2.09	0.08	0.25
MOL000929	(5S)-5-[(1R)-1,5-dimethylhex-4-enyl]-2-methylcyclohexa-1,3-diene	204.39	5.08	0	0	16.66	1.9	1.94	0.06	0.3
MOL000930	cis-.alpha.-Farnesene	204.39	5.46	0	0	8.15	1.92	1.85	0.05	0.35
MOL000931	Linderazulene	210.29	4.5	0	1	22.95	1.84	1.7	0.12	0.33
MOL000932	alpha-Farnesene	204.39	5.46	0	0	21.7	1.97	1.89	0.05	0.32
MOL000933	.gamma.-Bisabolene	204.39	5.47	0	0	20.78	1.94	1.98	0.06	0.28
MOL000934	β-seisquiphellandrene	204.39	5.14	0	0	7.46	1.91	2.05	0.06	0.3
MOL000935	Hepanal	204.39	4.36	0	0	53.83	1.86	2.17	0.1	0.24	11.92
MOL000936	Germacrene B	204.39	5.47	0	0	18.69	1.89	2.07	0.06	0.29
MOL000937	58870_FLUKA	204.39	4.36	0	0	49.01	1.82	2.08	0.1	0.22	12.47
MOL000938	calarene	204.39	4.12	0	0	51.55	1.82	2.05	0.11	0.23	-1.19
MOL000939	(1S,3E,7E,11S)-1,5,5,8-tetramethyl-12-oxabicyclo[9.1.0]dodeca-3,7-diene	220.39	3.8	0	1	34.37	1.58	1.76	0.1	0.3	3.8
MOL000940	bisdemethoxycurcumin	308.35	3.26	2	4	77.38	0.49	-0.08	0.26	0.44	4.69
MOL000941	Zingiberenol	222.41	4.18	1	1	31.43	1.31	1.22	0.07	0.27	4.17
MOL000942	(1R,4S,4aR,8aR)-4-isopropyl-1,6-dimethyl-3,4,4a,7,8,8a-hexahydro-2H-naphthalen-1-ol	222.41	3.78	1	1	31.67	1.32	1.3	0.09	0.24	6.87
MOL000943	epi-10- .gamma.-Eudesmol	222.41	3.86	1	1	28.1	1.47	1.74	0.1	0.21
MOL000944	(6R)-2-methyl-6-(4-methylphenyl)hept-2-en-4-one	216.35	4.2	0	1	40.84	1.59	1.5	0.07	0.36	5.14
MOL003127	Germacrene D	204.39	5.14	0	0	19.22	1.83	2.02	0.06	0
