# Supplementary material for: Antitumor Mechanisms of Curcumae Rhizoma Based on Network Pharmacology
Source: Evid Based Complement Alternat Med. 2018 Feb 5;2018:4509892. doi: 10.1155/2018/4509892 (PMC5832109; doi:10.1155/2018/4509892)
Supplement: Supplementary 2 — Table S2: total predicted Gene Ontology (GO) Biological Process (BP) for Curcumae Rhizoma using DAVID6.8. [file 4509892.f2.xls]

## Sheet: Sheet1
Term	P-Value
transcription initiation from RNA polymerase II promoter	8e-06
steroid hormone mediated signaling pathway	0.00016
signal transduction	0.00018
response to estrogen	0.00023
cellular response to nitric oxide	0.0003
cellular response to lipopolysaccharide	0.0012
positive regulation of gene expression	0.0013
peptidyl-serine phosphorylation	0.0016
positive regulation of transcription from RNA polymerase II promoter	0.0017
G2/M transition of mitotic cell cycle	0.002
ERBB2 signaling pathway	0.0022
negative regulation of extrinsic apoptotic signaling pathway	0.0022
positive regulation of transcription, DNA-templated	0.0023
response to retinoic acid	0.0026
positive regulation of MAP kinase activity	0.0053
negative regulation of cell proliferation	0.0058
Ras protein signal transduction	0.0074
vascular endothelial growth factor receptor signaling pathway	0.0078
extracellular matrix disassembly	0.0086
cellular response to insulin stimulus	0.0089
xenobiotic metabolic process	0.0091
regulation of transcription involved in cell fate commitment	0.0092
response to toxic substance	0.011
peroxisome proliferator activated receptor signaling pathway	0.013
regulation of early endosome to late endosome transport	0.015
regulation of stress-activated MAPK cascade	0.015
negative regulation of acute inflammatory response	0.015
stimulatory C-type lectin receptor signaling pathway	0.016
response to ethanol	0.016
response to drug	0.018
chemotaxis	0.021
regulation of signal transduction by p53 class mediator	0.022
pyrimidine nucleoside salvage	0.022
cellular response to epinephrine stimulus	0.022
cellular response to fluid shear stress	0.022
response to pH	0.022
fatty acid oxidation	0.026
uterus development	0.026
negative regulation of telomerase activity	0.027
peptidyl-tyrosine phosphorylation	0.032
lipid metabolic process	0.034
regulation of ryanodine-sensitive calcium-release channel activity	0.035
regulation of protein binding	0.035
positive regulation of ERK1 and ERK2 cascade	0.041
cellular senescence	0.042
positive regulation of muscle cell differentiation	0.043
heart development	0.045
bile acid and bile salt transport	0.049
